# Supplementary material for: Re-entrant relaxor ferroelectric behaviour in Nb-doped BiFeO3–BaTiO3 ceramics
Source: Royal Society of Chemistry journal article supplement (doi:10.1039/d2tc04702k), 2023-01-01
Supplement: d2tc04702k1.pdf [file d2tc04702k1.pdf]

## Supplementary Information

### Re-entrant Relaxor Ferroelectric Behaviour in Nb-Doped BiFeO<sub>3</sub>-BaTiO<sub>3</sub> Ceramics

Ziqi Yang,<sup>a</sup> Bing Wang,<sup>a</sup> Thomas Brown,<sup>b</sup> Steven J Milne,<sup>b</sup> Antonio Feteira,<sup>c</sup> Andreas Wohninsland,<sup>d</sup> K. V. Lalitha,<sup>d</sup> Yizhe Li,<sup>a</sup> and David A. Hall\*<sup>a</sup>

<sup>a</sup>*Department of Materials, University of Manchester, M13 9PL, Manchester, UK*

*E-mail: david.a.hall@manchester.ac.uk.*

<sup>b</sup>*School of Chemical and Process Engineering, University of Leeds, LS2 9JT, Leeds, UK*

<sup>c</sup>*Materials and Engineering Research Institute, Sheffield Hallam University, Sheffield S1 1WB, U.K.*

<sup>d</sup>*Institute of Materials Science, Technische Universität Darmstadt, Darmstadt 64287, Germany*

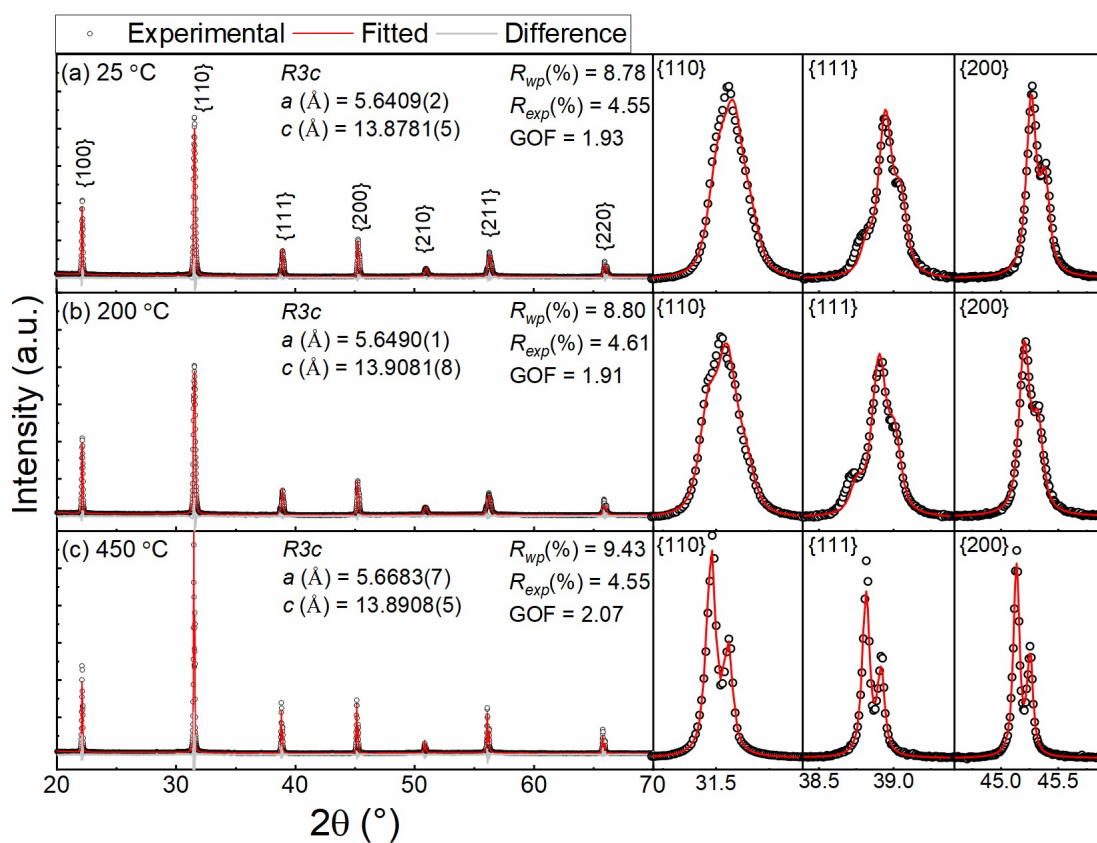

Figure S1. XRD patterns and refinements for Nb-doped 0.7BF-0.3BT ceramics at temperatures of (a) 25 °C, (b) 200 °C and (c) 450 °C respectively.

**Table S1.** Structural parameters of Nb-doped 0.7BF-0.3BT ceramics at different temperatures obtained from Rietveld refinement.

| <b>T (°C)</b> | <b>a (Å)</b> | <b>c (Å)</b> | <b><math>\alpha_R</math> (°)</b> | <b><math>\alpha_{pc}</math> (°)</b> | <b>90-<math>\alpha_{pc}</math> (°)</b> | <b><math>V_R</math> (Å<sup>3</sup>)</b> | <b><math>V_{pc}</math> (Å<sup>3</sup>)</b> |
|---------------|--------------|--------------|----------------------------------|-------------------------------------|----------------------------------------|-----------------------------------------|--------------------------------------------|
| <b>25</b>     | 5.6409(2)    | 13.8781(5)   | 59.806(5)                        | 89.832(5)                           | 0.167(5)                               | 382.42(8)                               | 63.73(8)                                   |
| <b>50</b>     | 5.6422(5)    | 13.8842(6)   | 59.797(5)                        | 89.824(7)                           | 0.175(3)                               | 382.77(6)                               | 63.79(6)                                   |
| <b>75</b>     | 5.6430(4)    | 13.8888(5)   | 59.789(1)                        | 89.817(3)                           | 0.182(7)                               | 383.01(1)                               | 63.83(5)                                   |
| <b>100</b>    | 5.6446(1)    | 13.8958(1)   | 59.779(3)                        | 89.808(8)                           | 0.191(2)                               | 383.41(4)                               | 63.90(2)                                   |
| <b>125</b>    | 5.6453(3)    | 13.898(10)   | 59.778(1)                        | 89.807(7)                           | 0.192(3)                               | 383.57(3)                               | 63.92(9)                                   |
| <b>150</b>    | 5.6466(1)    | 13.9020(4)   | 59.775(1)                        | 89.805(2)                           | 0.194(8)                               | 383.85(7)                               | 63.97(6)                                   |
| <b>175</b>    | 5.6481(6)    | 13.9064(8)   | 59.773(2)                        | 89.803(6)                           | 0.196(4)                               | 384.19(3)                               | 64.03(2)                                   |
| <b>200</b>    | 5.6490(1)    | 13.9081(8)   | 59.774(4)                        | 89.804(6)                           | 0.195(4)                               | 384.35(5)                               | 64.05(9)                                   |
| <b>225</b>    | 5.6502(9)    | 13.9105(1)   | 59.777(1)                        | 89.807(1)                           | 0.193(1)                               | 384.59(4)                               | 64.09(9)                                   |
| <b>250</b>    | 5.6521(2)    | 13.9136(7)   | 59.781(3)                        | 89.810(6)                           | 0.189(4)                               | 384.93(1)                               | 64.15(5)                                   |
| <b>275</b>    | 5.6532(5)    | 13.9157(6)   | 59.783(5)                        | 89.812(5)                           | 0.187(5)                               | 385.14(2)                               | 64.19(1)                                   |
| <b>300</b>    | 5.6547(9)    | 13.9166(7)   | 59.792(6)                        | 89.820(4)                           | 0.179(6)                               | 385.37(8)                               | 64.23(1)                                   |
| <b>325</b>    | 5.6563(2)    | 13.9179(1)   | 59.800(6)                        | 89.827(3)                           | 0.172(7)                               | 385.62(1)                               | 64.27(1)                                   |
| <b>350</b>    | 5.6576(5)    | 13.9168(8)   | 59.814(2)                        | 89.839(1)                           | 0.160(9)                               | 385.77(3)                               | 64.29(5)                                   |
| <b>375</b>    | 5.6595(5)    | 13.9174(2)   | 59.827(3)                        | 89.850(4)                           | 0.149(6)                               | 386.04(7)                               | 64.34(1)                                   |
| <b>400</b>    | 5.6618(6)    | 13.9151(1)   | 59.852(6)                        | 89.872(4)                           | 0.127(6)                               | 386.29(8)                               | 64.38(3)                                   |
| <b>425</b>    | 5.6645(4)    | 13.9095(3)   | 59.891(2)                        | 89.905(8)                           | 0.094(2)                               | 386.50(9)                               | 64.41(8)                                   |
| <b>450</b>    | 5.6683(7)    | 13.8908(5)   | 59.980(2)                        | 89.982(8)                           | 0.017(2)                               | 386.51(2)                               | 64.41(9)                                   |
| <b>400</b>    | 5.6631(8)    | 13.9090(9)   | 59.881(9)                        | 89.897(7)                           | 0.102(3)                               | 386.31(1)                               | 64.38(5)                                   |
| <b>350</b>    | 5.6585(1)    | 13.9153(9)   | 59.825(6)                        | 89.849(1)                           | 0.151(1)                               | 385.84(8)                               | 64.30(8)                                   |
| <b>300</b>    | 5.6547(1)    | 13.9156(1)   | 59.795(3)                        | 89.822(7)                           | 0.177(3)                               | 385.33(6)                               | 64.22(3)                                   |
| <b>250</b>    | 5.6514(9)    | 13.9128(2)   | 59.779(1)                        | 89.808(7)                           | 0.191(3)                               | 384.82(2)                               | 64.13(7)                                   |
| <b>200</b>    | 5.6484(4)    | 13.9089(5)   | 59.767(6)                        | 89.798(7)                           | 0.201(3)                               | 384.29(9)                               | 64.05(1)                                   |
| <b>150</b>    | 5.6460(3)    | 13.9023(6)   | 59.769(6)                        | 89.800(5)                           | 0.199(5)                               | 383.78(9)                               | 63.96(5)                                   |
| <b>100</b>    | 5.6432(7)    | 13.8950(3)   | 59.771(3)                        | 89.802(1)                           | 0.198(1)                               | 383.21(3)                               | 63.86(9)                                   |
| <b>50</b>     | 5.6411(8)    | 13.8852(9)   | 59.785(8)                        | 89.814(5)                           | 0.185(5)                               | 382.65(9)                               | 63.77(7)                                   |

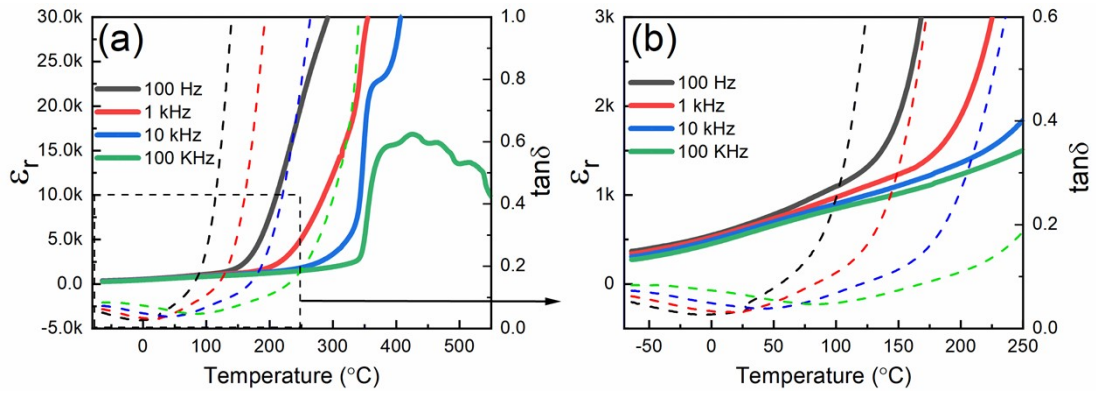

Figure S2. (a) Temperature dependence of relative permittivity ( $\epsilon_r$ ) and loss ( $\tan \delta$ ) for Ar annealed pure 0.7BF-0.3BT ceramics and (b) details of relative permittivity and dielectric loss over the temperature range from -60 to 250 °C.

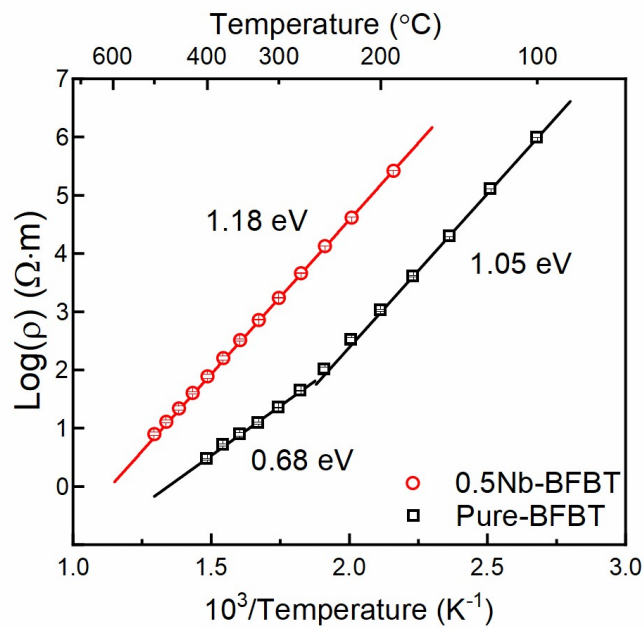

Figure S3. Arrhenius plot of resistivity of Nb-doped 0.7BF-0.3BT and Ar annealed pure 0.7BF-0.3BT ceramics.

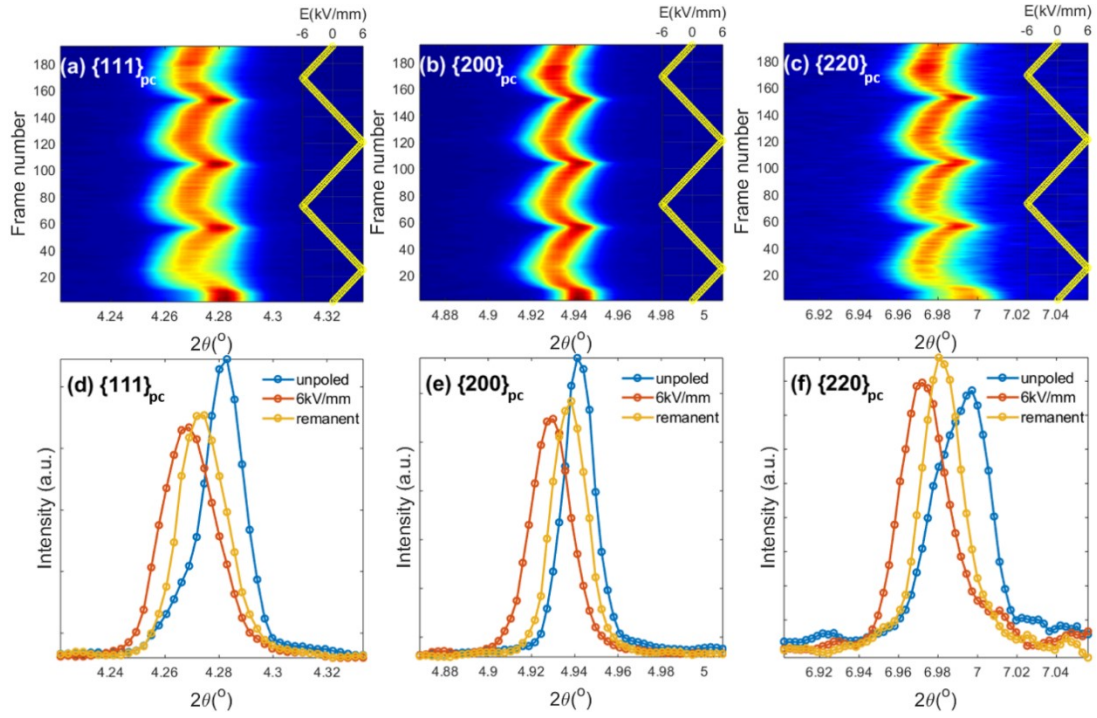

Figure S4. XRD contour plots of Nb-doped 0.7BF-0.3BT ceramics at 25 °C for the  $\{111\}_{pc}$ ,  $\{200\}_{pc}$  and  $\{220\}_{pc}$  reflections under 2 bipolar electric field cycles in (a), (b) and (c) respectively, and comparison of peak profiles for the unpoled state, under an electric field of 6 kV mm<sup>-1</sup> and in the remanent state in (d), (e) and (f).

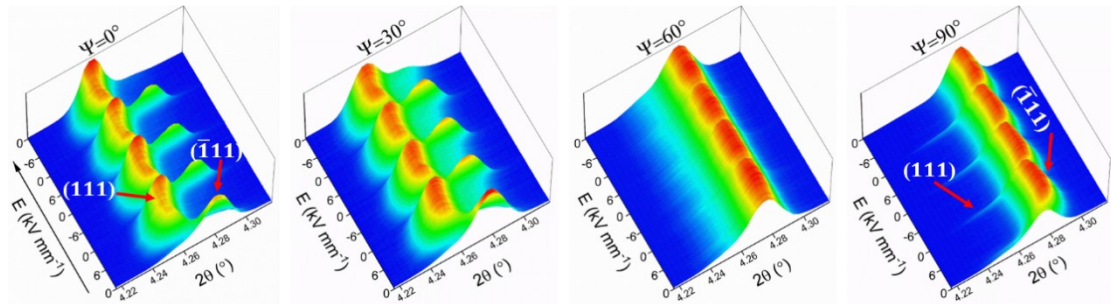

Figure S5. In-situ synchrotron XRD contour plots of the  $\{111\}_{pc}$  reflections for Nb-doped 0.7BF-0.3BT ceramics at 125 °C under 2 bipolar electric field cycles, for azimuthal angles,  $\psi = 0^\circ, 30^\circ, 60^\circ$  and  $90^\circ$ .

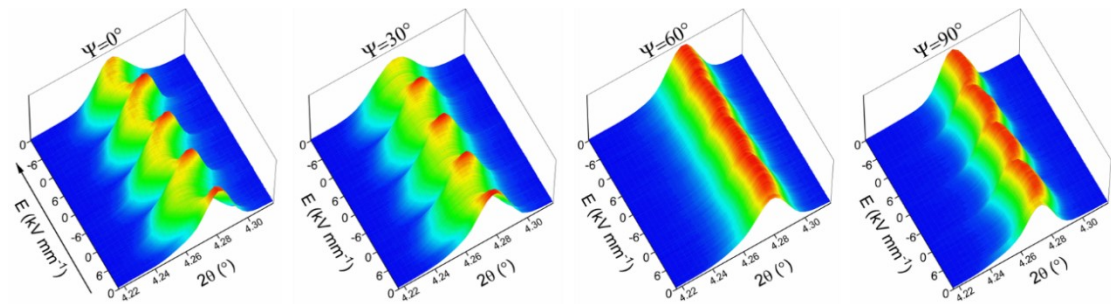

Figure S6. In-situ synchrotron XRD contour plots of the  $\{111\}_{pc}$  reflections for Nb-doped 0.7BF-0.3BT ceramics at 25 °C under 2 bipolar electric field cycles, for azimuthal angles,  $\psi = 0^\circ, 30^\circ, 60^\circ$  and  $90^\circ$ .
